# Supplementary material
Source: HighWire-hosted journal article supplement (https://www.life-science-alliance.org/content/2/2/e201800262/F9)

Figure S5

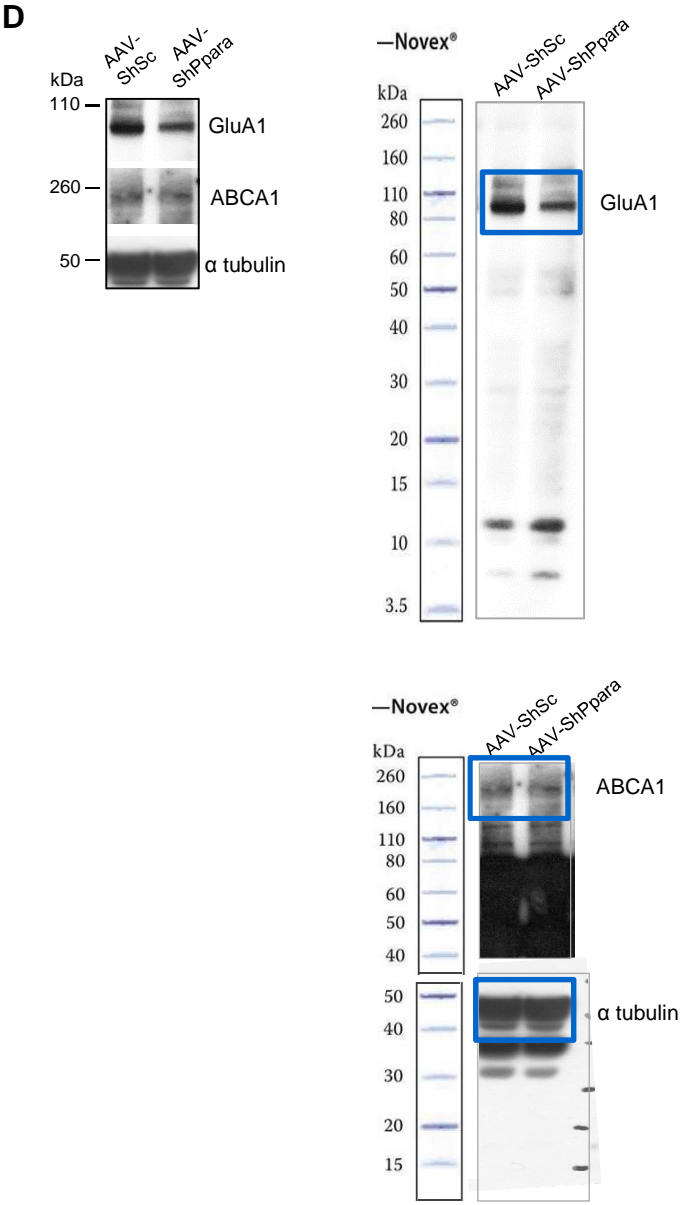

Supplement: inline-supplementary-material-8 [file inline-supplementary-material-8.pdf]
